# Supplementary material
Source: HighWire-hosted journal article supplement (doi:10.1101/rna.079886.123)
Supplement: Supplemental_Figure_Legends.docx [file Supplemental_Figure_Legends.docx]

**Supplementary Figure 1. Additive effects of combinations of *prp8* alleles**

(A) Suppression of *prp16-302* growth defects at 18ºC by the double mutant *prp8*-*T589P+K611I* allele in *prp16*∆ *prp8*∆ strain (yCQ06) demonstrates additive effects compared to single *prp8* mutants. (B) Double mutant *prp8*-*T589P+K611I* allele exerts stronger *ts* phenotype as compared to single *prp8* mutants. (C) In *prp8*∆ U6∆ strain (yCQ05), *prp8-T589P* allele becomes additively *ts* in combination with a double U6-A42g+C43u allele. In B-C alleles are tested by growth in the presence of 5FOA.

**Supplementary Figure 2. Effects of U6 and *cwc2* alleles on splicing of gAG/ introns**

(A) Schematic of *ACT1-CUP1* reporter indicating the gAG/-3′SS mutation. (B-C) Primer extension and copper growth assays for intron mutant reporter gAG/ in strains carrying *cwc2* (yMK79) or U6 (yMK20) alleles. (B) *cwc2*-*W37A, S38P, Q56H, W225R*, and (C) U6-A42g, C43u, A44c alleles do not significantly affect the efficiency of gAG/ intron splicing.

**Supplementary Figure 3. Multiple sequence alignment of regions of the Prp8 N-terminal domain**

The aligned N-terminal Prp8 segments are from *Saccharomyces cerevisiae*, *Schizosaccharomyces pombe*, *Homo sapiens*, *Mus musculus*, *Drosophila melanogaster*, *Caenorhabditis elegans*, *Arabidopsis thaliana*, *Dictyostelium discoideum*, *Trichomonas vaginalis*, *Leishmania donovani*, and *Trypanosoma brucei brucei*. All sequences are aligned using ClustalW. Residues mutated in the screen for *prp16-302* suppressors are bold, indicated by numbers corresponding to *S. cerevisiae* Prp8 sequence, and colored in different species using clustal2 color scheme. Prp8 residues Y590, K603, K611, and K613 are highly conserved across analyzed species.
