# Supplementary material
Source: HighWire-hosted journal article supplement (doi:10.1101/rna.079886.123)
Supplement: Supplemental_Table_S1.docx [file Supplemental_Table_S1.docx]

| **Table S1. Yeast strains and plasmids used in this work** | | |
| --- | --- | --- |
| **Name** | **Genotype** | **Plasmids** |
| yCQ166 | *MATα ade2 cup1∆::ura3 his3 leu2 lys2 trp1 ura3 GAL+ snR6∆::*loxP *prp16∆::kanMX4*; | pSX6 (*SNR6* *TRP1* CEN ARS), pRS316-*PRP16* (*PRP16* *URA3* CEN ARS) |
| yMK20 | *MATα ade2 cup1∆::ura3 his3 leu2 lys2 trp1 ura3 GAL+ snR6∆::*loxP; | pRS316-U6+U2 (*SNR6 SNR20* *URA3* CEN ARS) |
| yMK36 | *MATa ade2 cup1∆::ura3 his3 leu2 lys2 trp1 ura3 GAL+ prp16∆::kanMX4* | pRS316-*PRP16* (*PRP16* *URA3* CEN ARS) |
| yMK78 | *MATa leu2 cup1∆::ura3 ura3 trp1 his3 YDL209c∆::kanMX4 snR6::hphN1* | pRS416-*CWC2*+U6 (*YDL209* *SNR6* *URA3* CEN ARS) |
| yMK79 | *MATa leu2 cup1∆::ura3 ura3 trp1 his3 YDL209c∆::kanMX4* | pRS416-*CWC2*+U6 (*YDL209 SNR6* *URA3* CEN ARS) |
| yAAH1915 (kind gift of Aaron Hoskins) | *MATα ade2 leu2 cup1∆::ura3 ura3 trp1 his3 hsh155∆::kanMX4; prp2∆::hphMX* | pRS414-*HSH155* (*HSH155* *TRP1* CEN ARS), pRS415-*PRP2* (*PRP2* *LEU2* CEN ARS) |
| yCQ05 | *MATa ade2 cup1∆::ura3 his3 leu2 lys2 trp1 prp8∆::LYS2 snR6::kanMX4* | pJU169 (*PRP8* *URA3* CEN ARS); pRS314-U6 (*SNR6* *TRP1* CEN ARS) |
| yCQ06 | *MATa ade2 cup1∆::ura3 his3 leu2 lys2 trp1 prp8∆::LYS2 prp16∆::kanMX4* | pJU225-4 (*PRP8* *TRP1* 2μ ARS); pRS316-*PRP16* (*PRP16* *URA3* CEN ARS) |
| yJU75 | *MATa ade2 cup1∆::ura3 his3 leu2 lys2 trp1 prp8∆::LYS2* | pJU169 (*PRP8* *URA3* CEN ARS) |

Above strains carried plasmid-borne alleles of U6 (pSX6 *TRP1* CEN), *PRP16* (pRS313-*PRP16 HIS3* CENorpRS314-*PRP16 TRP1* CEN), *CWC2* (pRS313-*CWC2* *HIS3* CEN), *PRP2* (pRS415-*PRP2* *LEU2* CEN)*,* and *PRP8* (pJU225-4 *TRP1* 2μ)*,* as indicated in the figures.
